# Supplementary material for: Adaptation of the periplasm to maintain spatial constraints essential for cell envelope processes and cell viability
Source: eLife journal article supplement (doi:10.7554/elife.73516), 2022-01-27
Supplement: supp [file elife_poa_e73516_Figure_2_figure_supplement_1.pdf › elife_poa_e73516_Figure_2_figure_supplement_1.pdf]

Lpp
Lpp<sup>+21</sup>

MKATKLVLGAVILGSTLLAGCSSNAKIDQLSSDVQTLNAKVDQLSNDVNAMRSDVQAAKDDAARANQRLDNMATKYRK
MKATKLVLGAVILGSTLLAGCSSNAKIDQLSSDVQTLNAKVDQLSNDVNAMRSDVQAAKDDAARANQRLDNMATKYRK

Shared unique peptided

21 Insertion

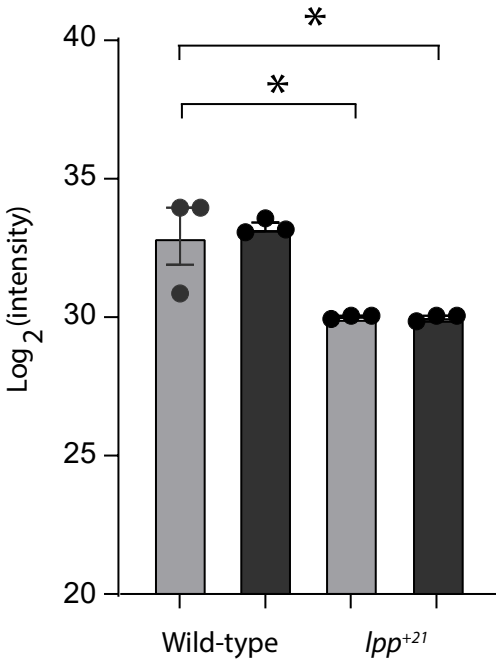

- M9 minimal media
- M9 minimal media (0.5 M sorbitol)
