# Supplementary figures and images for: Adaptation of the periplasm to maintain spatial constraints essential for cell envelope processes and cell viability
Source: eLife journal article supplement (doi:10.7554/elife.73516), 2022-01-27

A

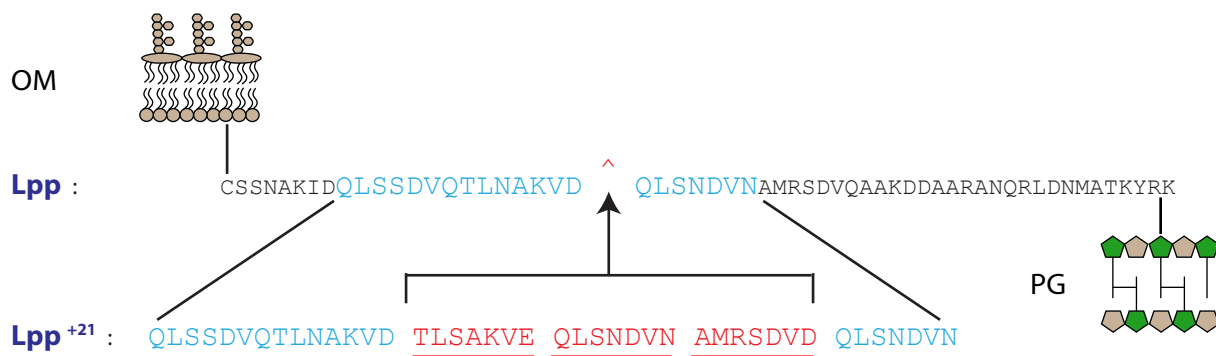

B

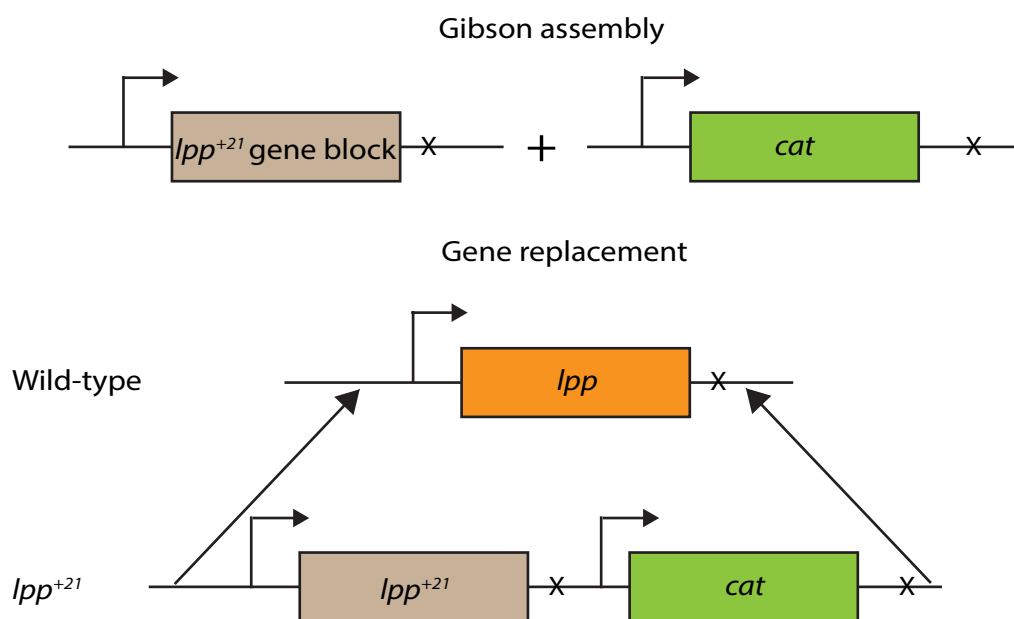

C

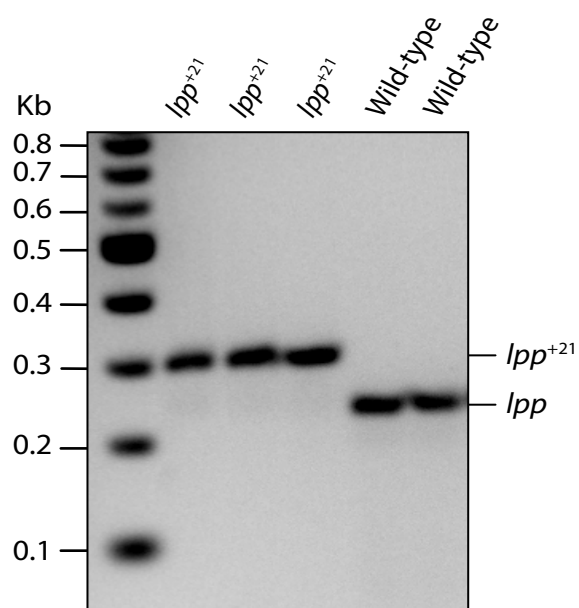

Supplement: supp [file elife_poa_e73516_Figure_1_figure_supplement_1.pdf › elife_poa_e73516_Figure_1_figure_supplement_1.pdf]

A

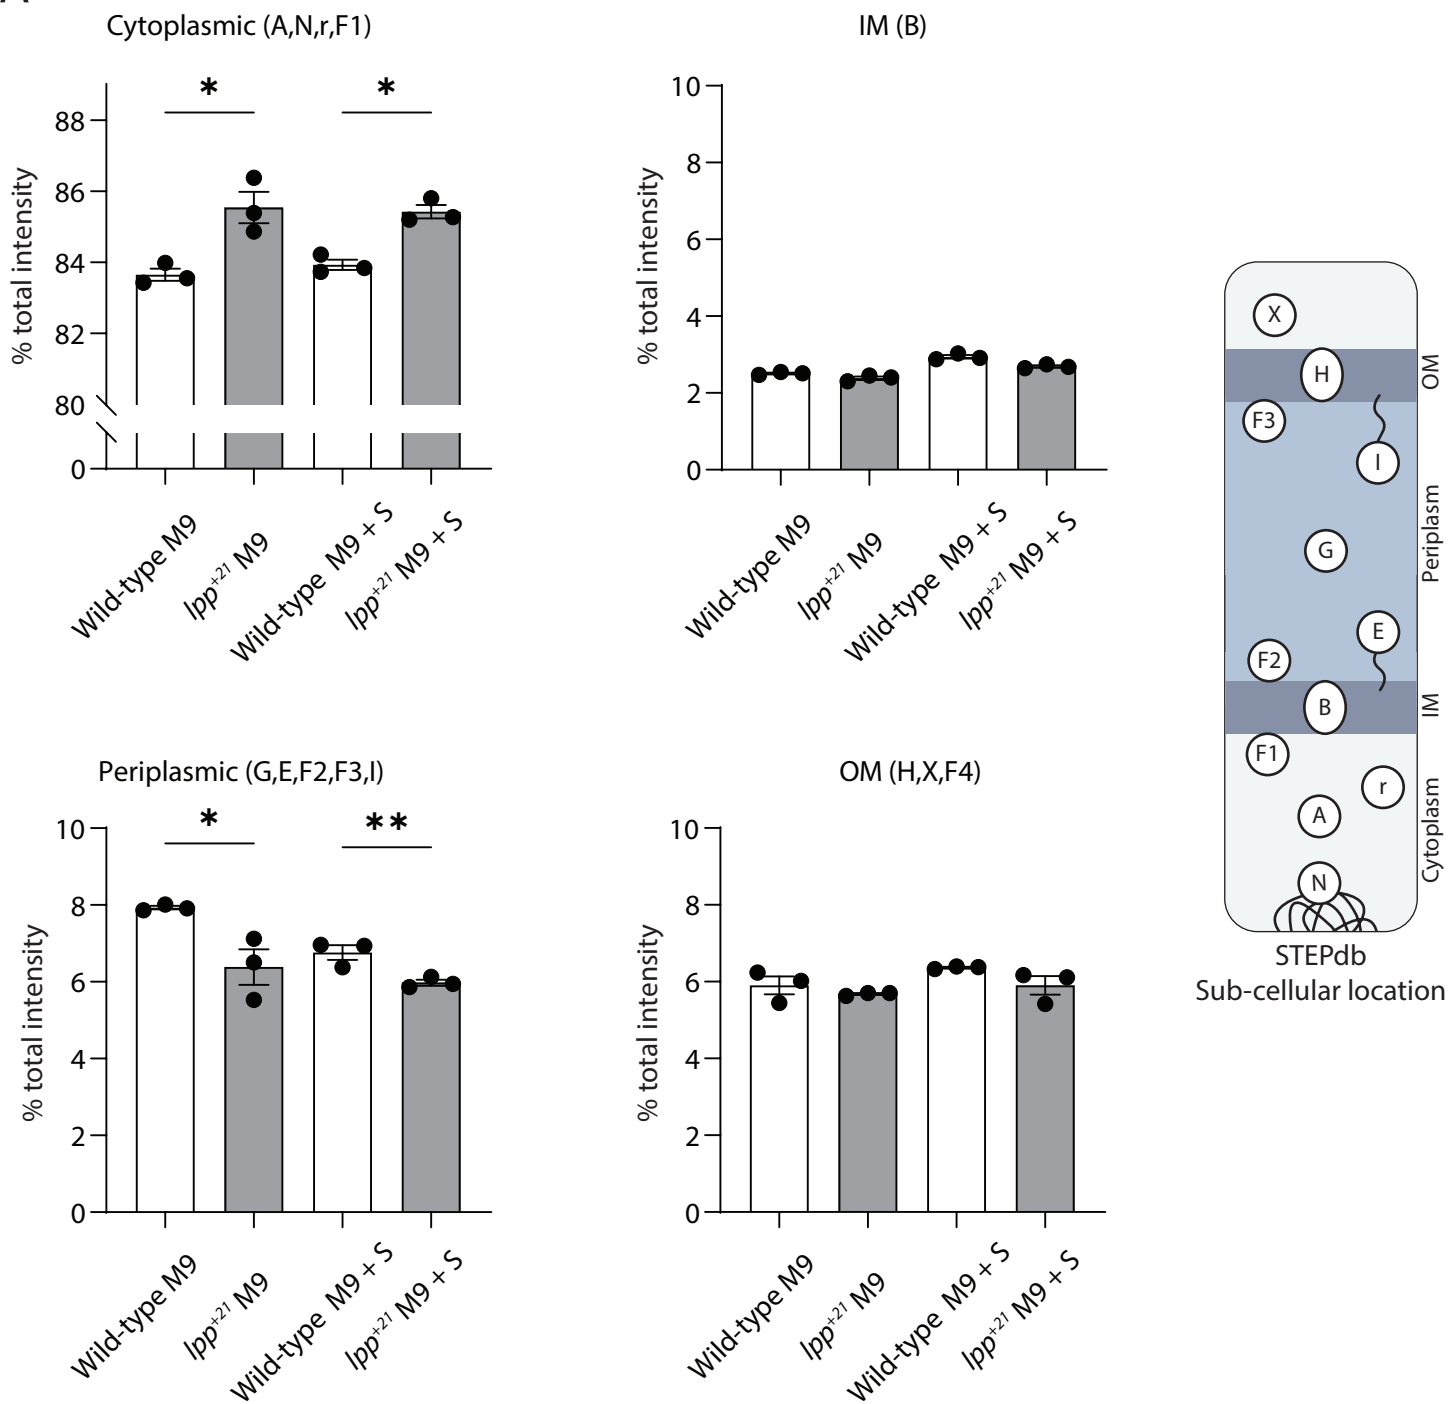

B

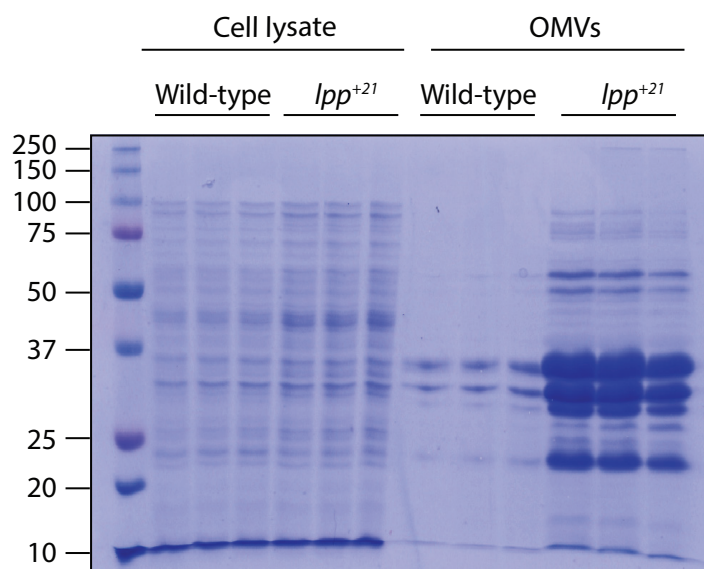

Supplement: supp [file elife_poa_e73516_Figure_2_figure_supplement_2.pdf › elife_poa_e73516_Figure_2_figure_supplement_2.pdf]

A

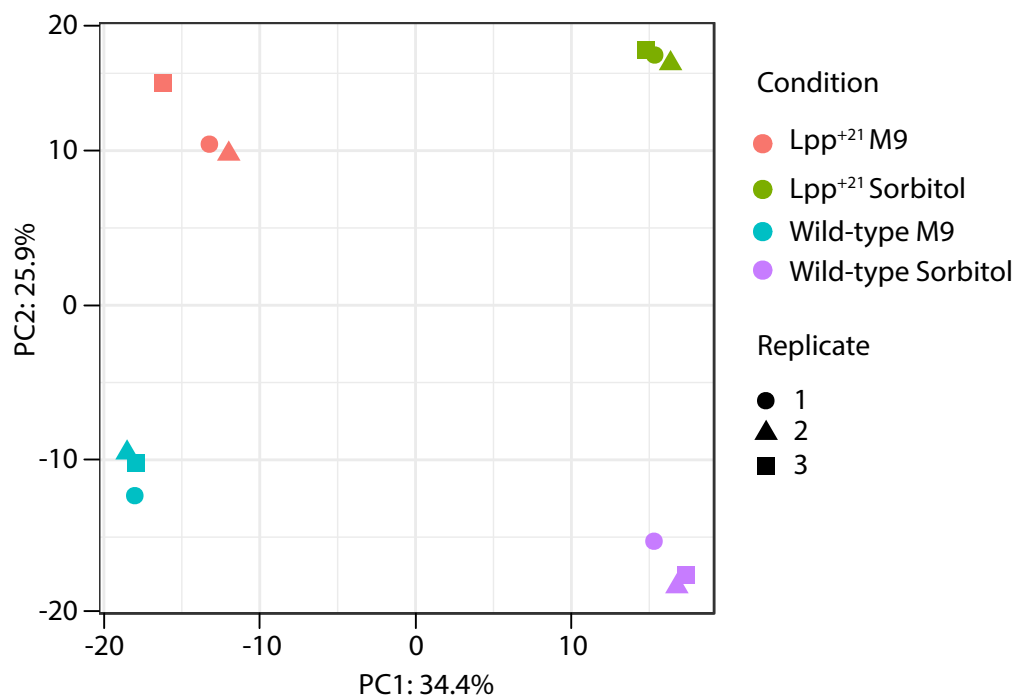

B

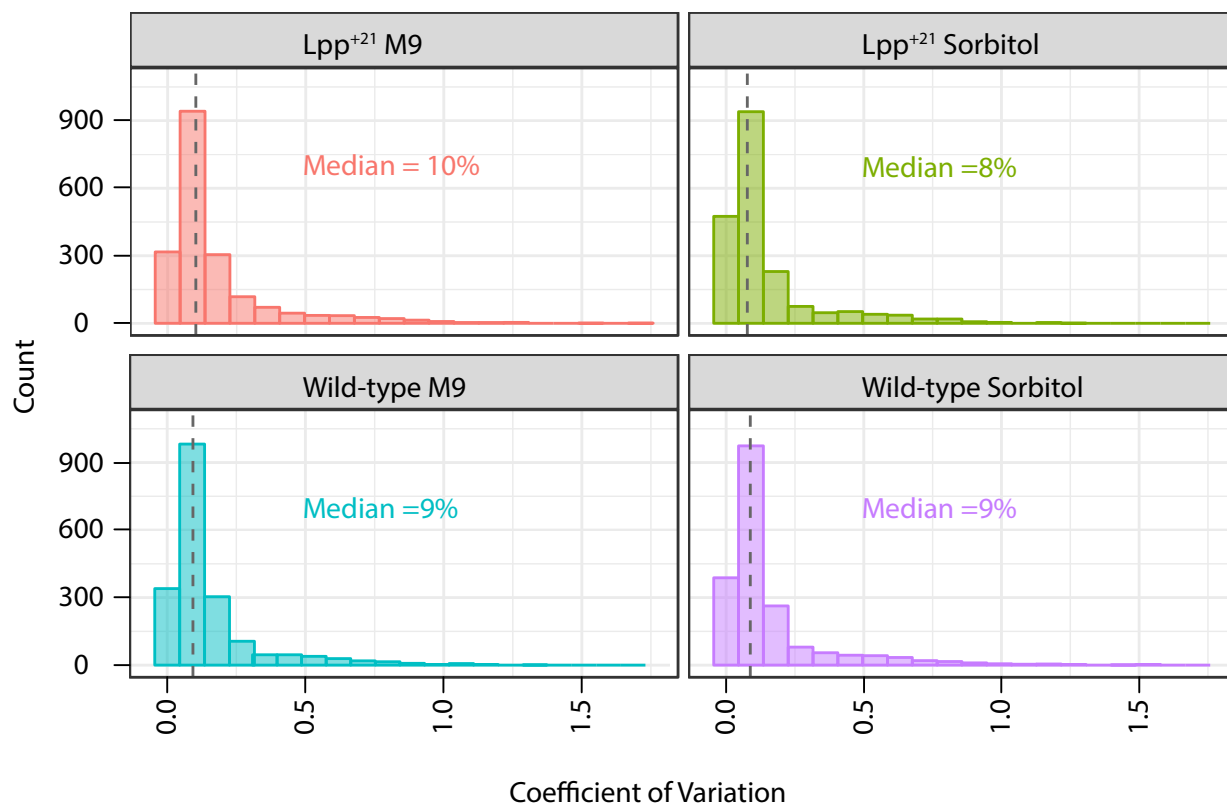

Supplement: supp [file elife_poa_e73516_Figure_2_figure_supplement_3.pdf › elife_poa_e73516_Figure_2_figure_supplement_3.pdf]

A

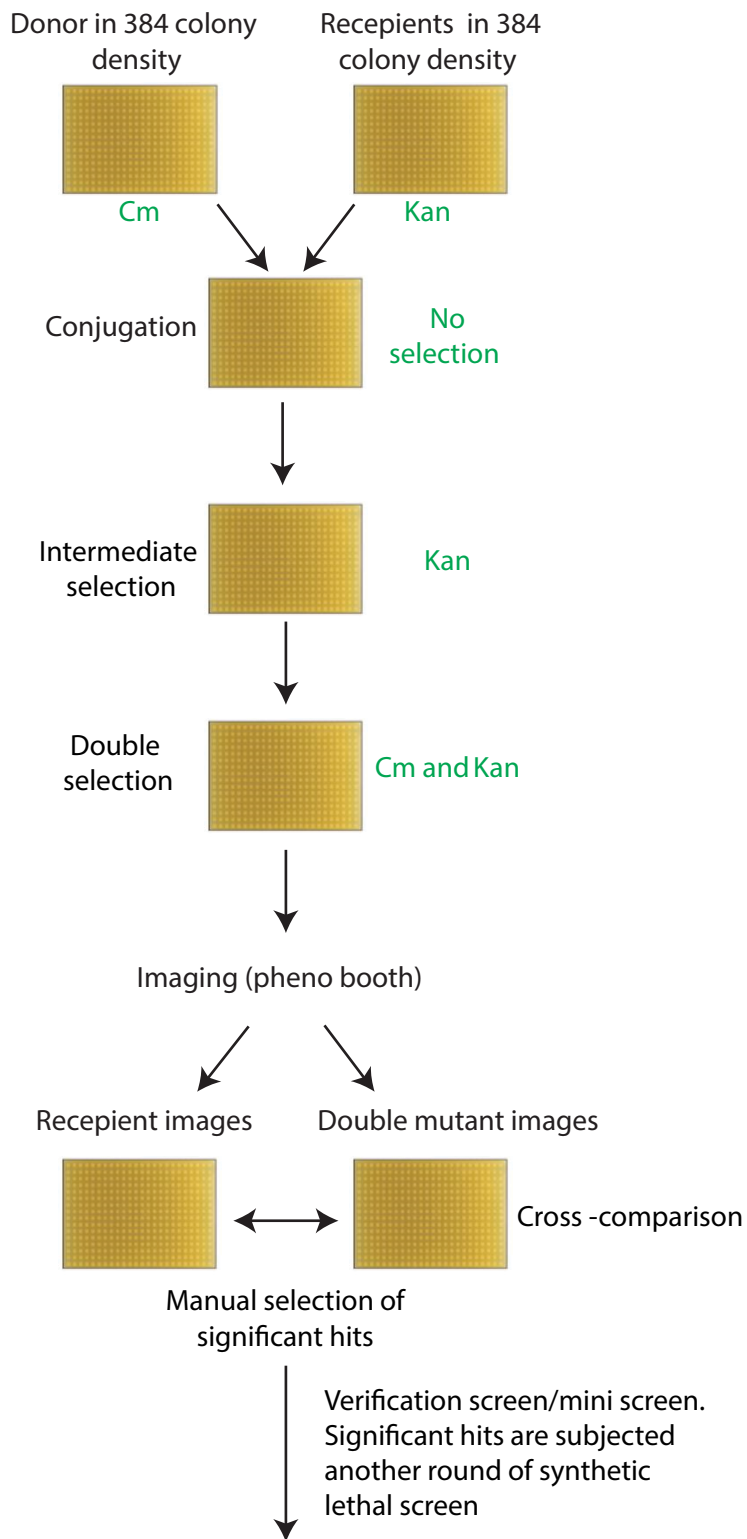

B

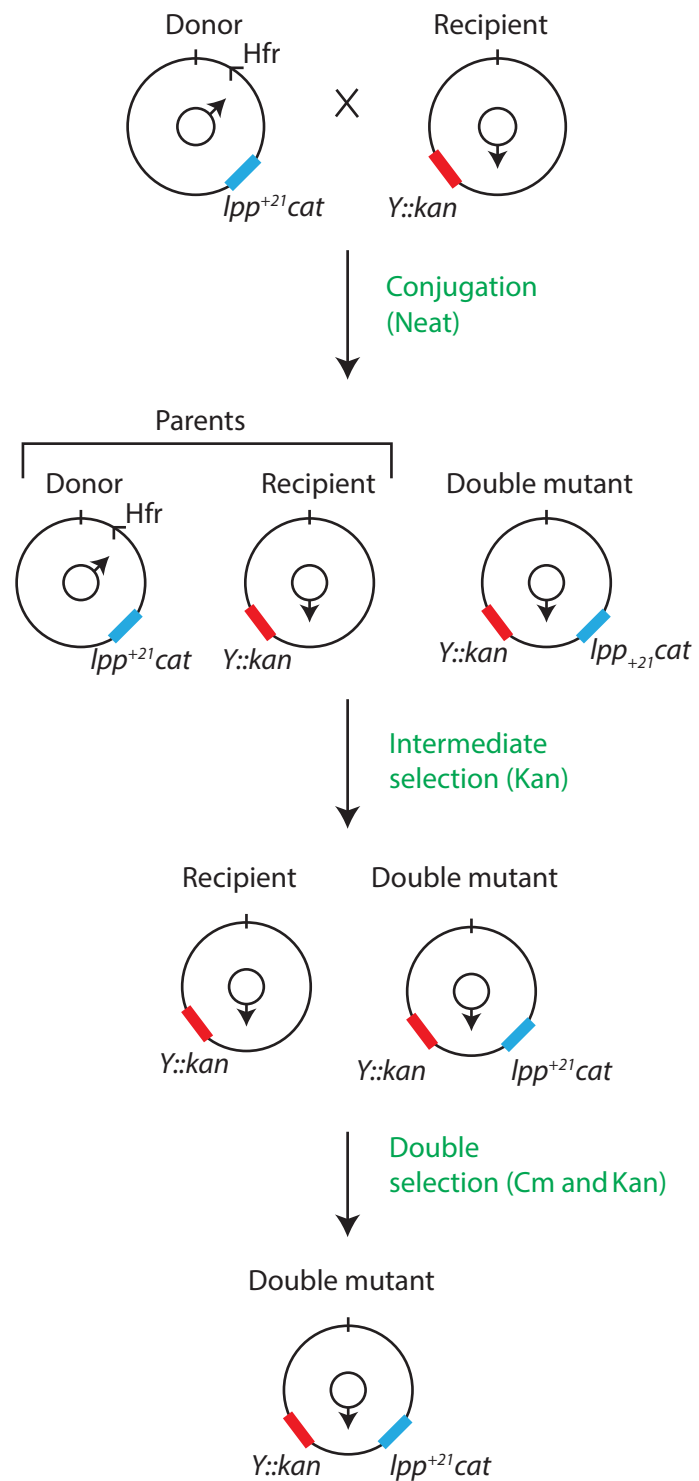

C

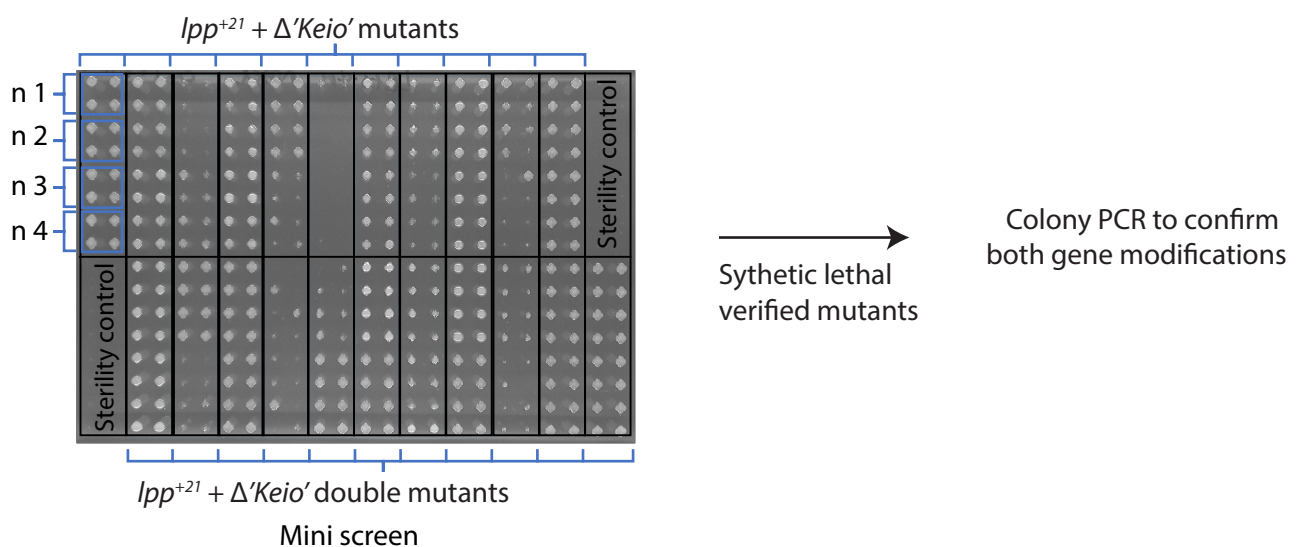

Supplement: supp [file elife_poa_e73516_Figure_3_figure_supplement_1.pdf › elife_poa_e73516_Figure_3_figure_supplement_1.pdf]

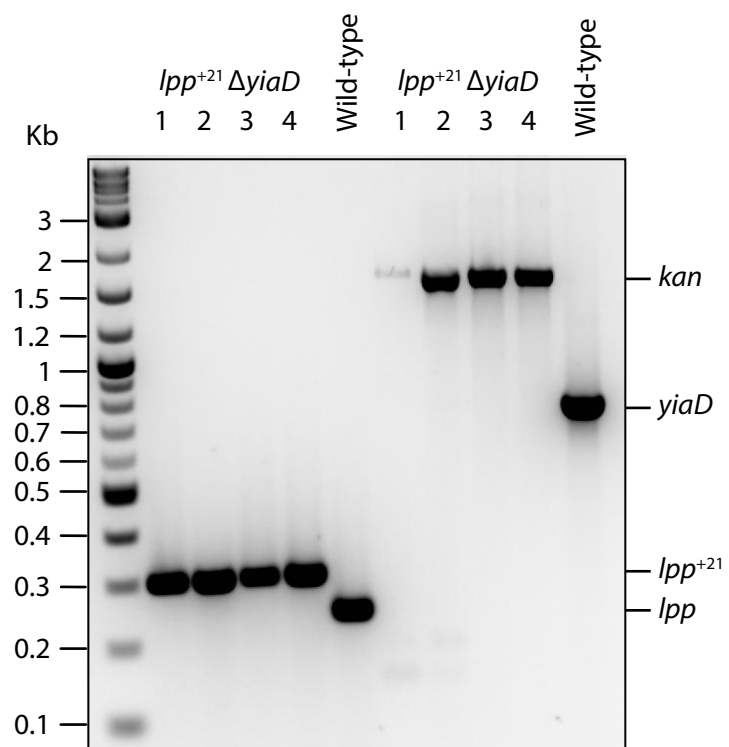

Supplement: supp [file elife_poa_e73516_Figure_3_figure_supplement_2.pdf › elife_poa_e73516_Figure_3_figure_supplement_2.pdf]

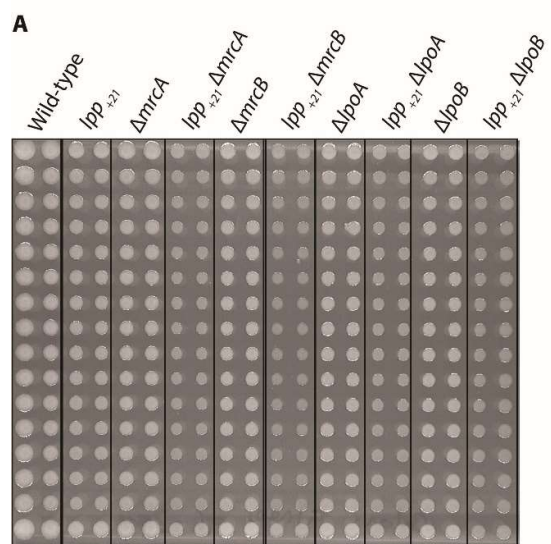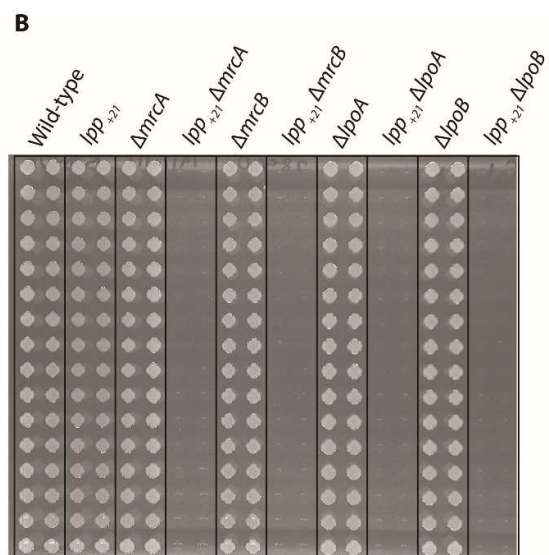

Supplement: supp [file elife_poa_e73516_Figure_3_figure_supplement_3.pdf › elife_poa_e73516_Figure_3_figure_supplement_3.pdf]

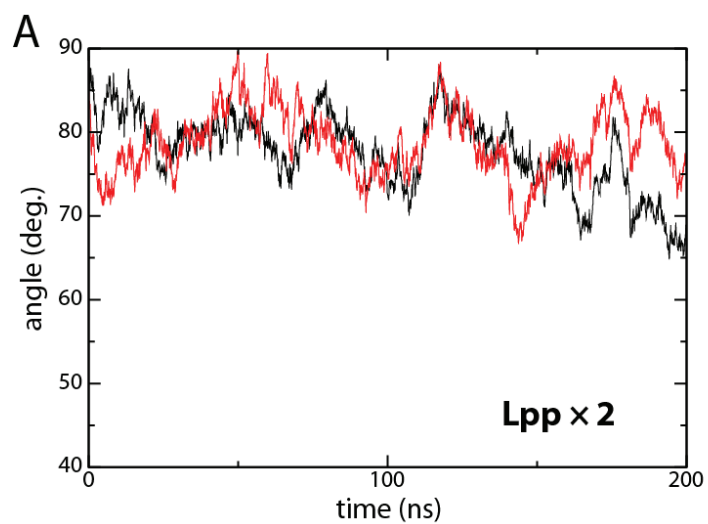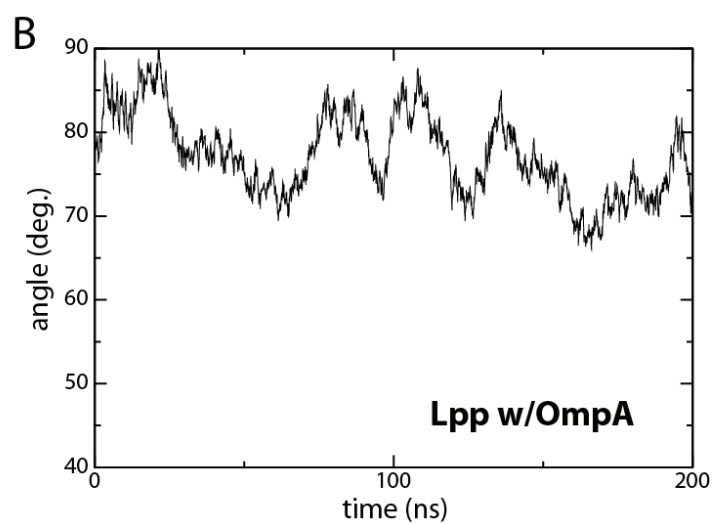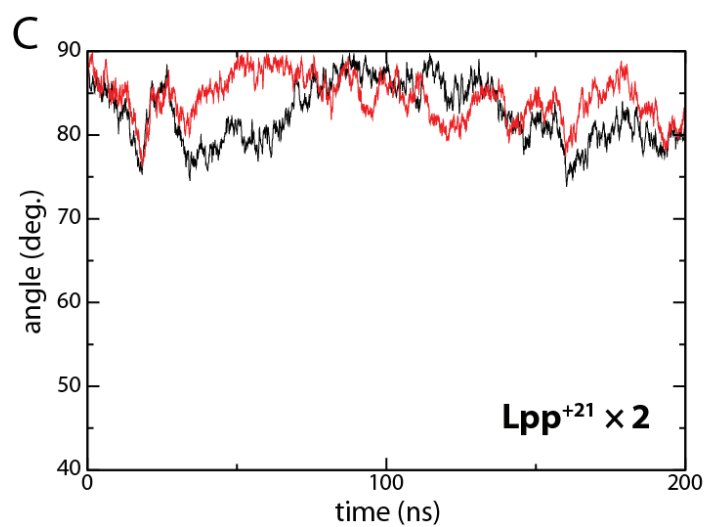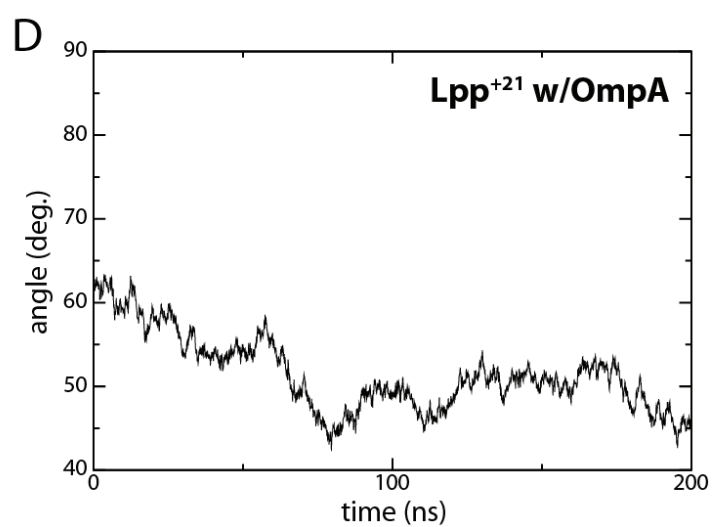

Supplement: supp [file elife_poa_e73516_Figure_4_figure_supplement_1.pdf › elife_poa_e73516_Figure_4_figure_supplement_1.pdf]

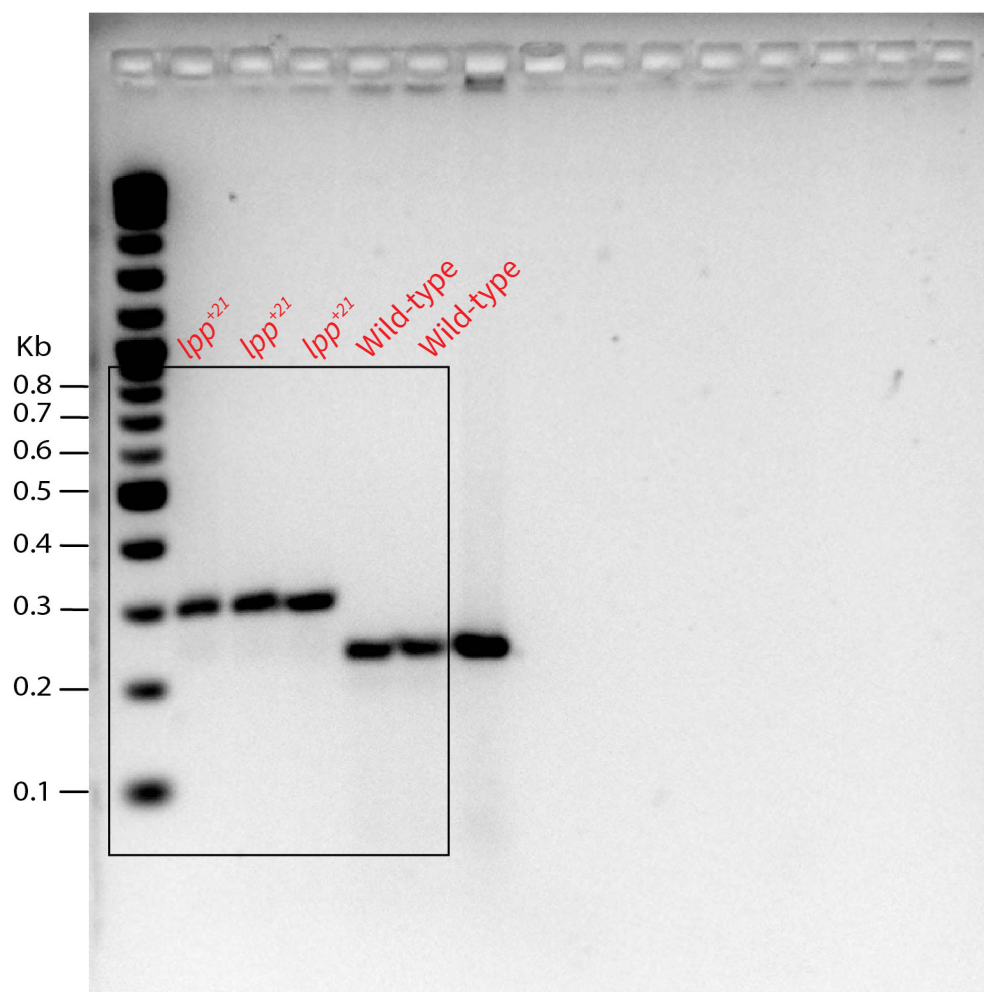

Figure S1C Source Data

Supplement: supp7 [file elife-73516-supp7-v2.zip]

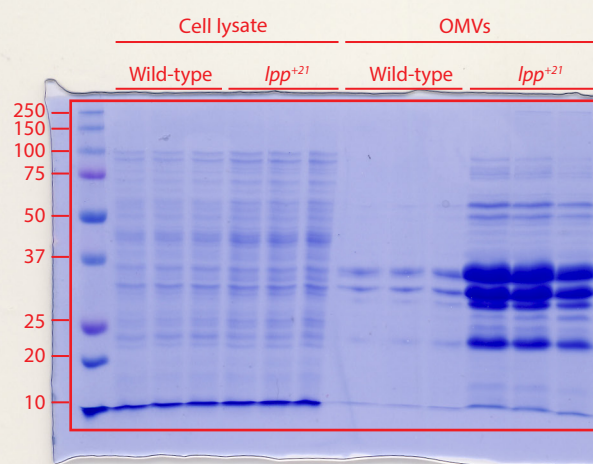

Figure S3B Source data

Supplement: supp7 [file elife-73516-supp7-v2.zip]

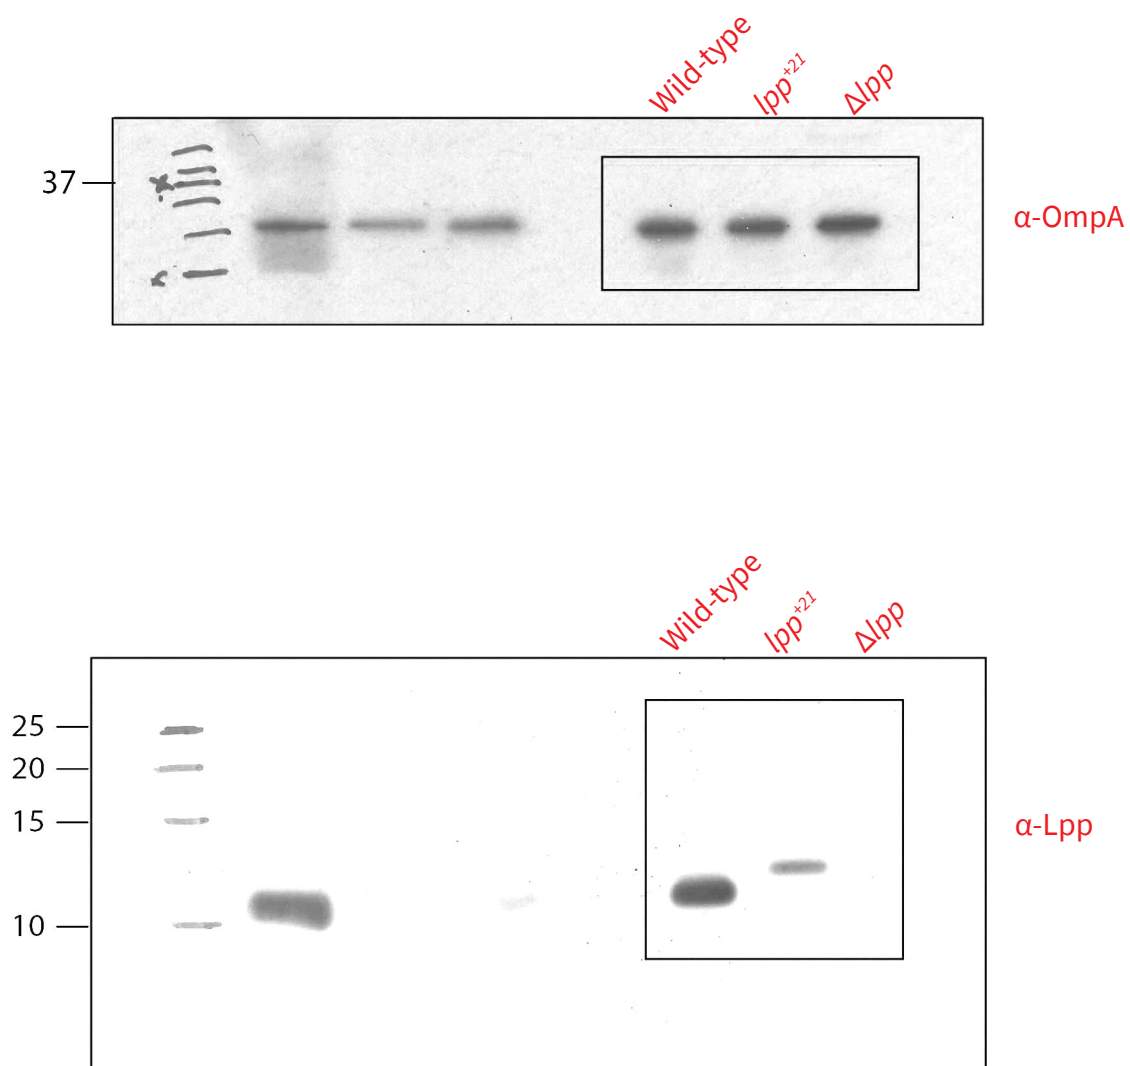

Figure 1B Source Data

Supplement: supp7 [file elife-73516-supp7-v2.zip]

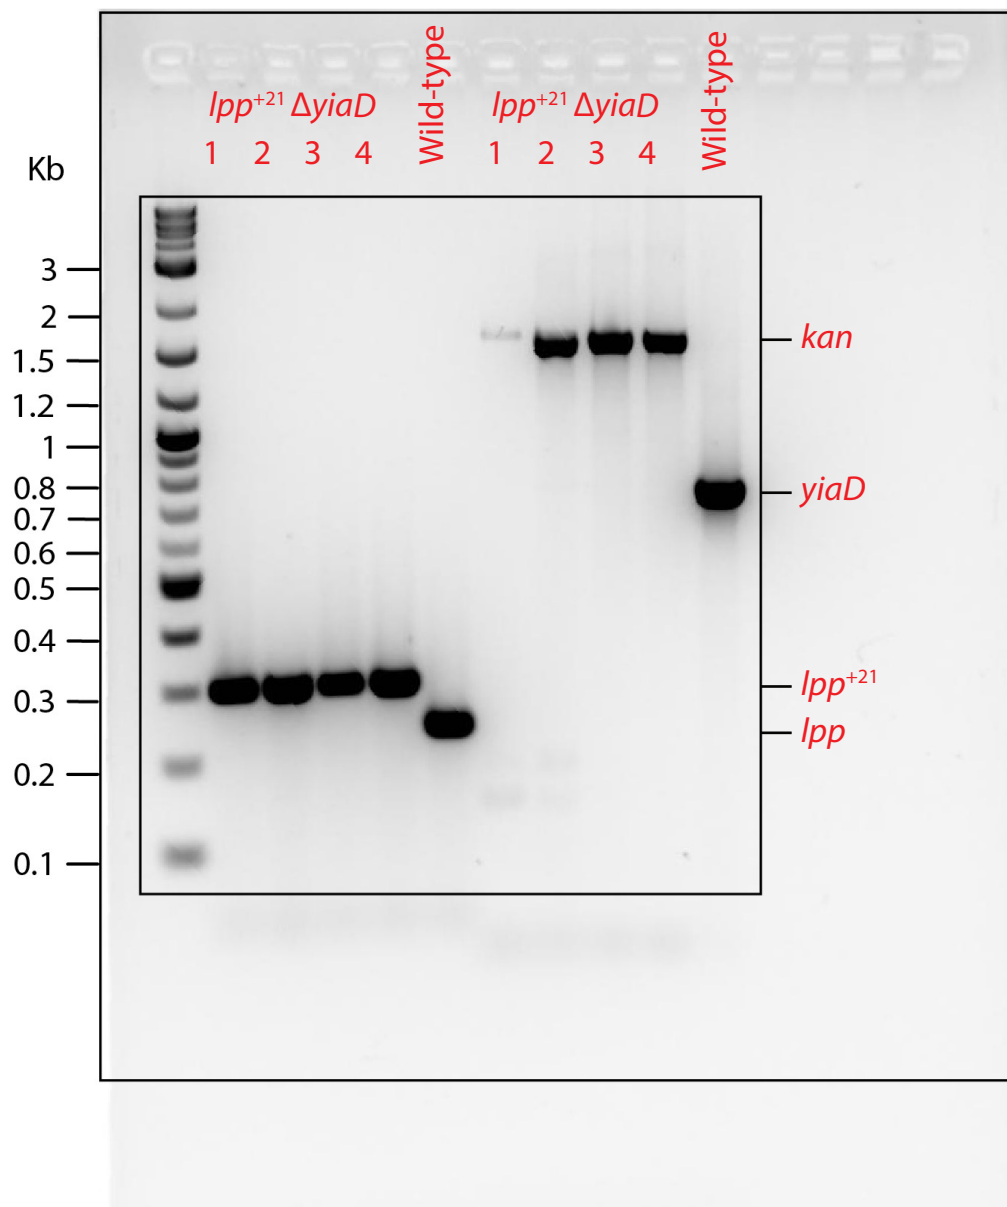

Figure S5 Source Data

Supplement: supp7 [file elife-73516-supp7-v2.zip]
